# Supplementary material
Source: publisher site journal article supplement (https://www.dovepress.com/article/435156)
Supplement: Supplementary file 1 [file get_supplementary_file.php]

**Supplementary Material**

**Supplemental Table 1**. List of Primers used in this study

| Gene symbol | Forward | Reverse |
| --- | --- | --- |
| *Adamts4* | GCATTCCATGGTACAGGGTTA | AGTTGACAGGGTTTCGGATG |
| *Adamts5* | TGCCACAGACCCAACTAAAG | CCATGGCTGATGACAGAGTT |
| *Mmp3* | GGACCAGGGATTAATGGAGATG | TGAGCAGCAACCAGGAATAG |
| *Mmp9* | TCTGTATGGTCGTGGCTCTAA | GGAGGTATAGTGGGACAC |
| *Mmp13* | CCCTGATGTTTCCCATCTATACC | TTCATCGCCTGGACCATAAAG |
| *Ccl2* | CTCAGCCAGATGCAGTTA | GTGATCCTCTTGTAGCTCTC |
| *Ccl3* | TTCCTGACTAAGAGAAACCG | TCAGGCATTCAGTTCCAG |
| *Ccl4* | CCACTTCCTGCTGTTTCTCTTA | CAAAGACTGCTGGTCTCATAGT |
| *Ccl5* | GCCCACGTCAAGGAGTATTT | CTTGAACCCACTTCTTCTCTGG |
| *Ccl11* | TCCACAGCGCTTCTATTC | GATAAAGCAGCAGGAAGTTG |
| *Ccl12* | CTCATAGCTACCACCATCAG | CTTCCGGACGTGAATCTT |
| *Cxcl2* | GACAGAAGTCATAGCCACTCTC | GCCTTGCCTTTGTTCAGTATC |
| *Cxcl3* | CAGAAGTCATAGCCACTCTC | CTTGCCGCTCTTCAGTAT |
| *F4/80* | TGACTCACCTTGTGGTCCTAA | CTTCCCAGAATCCAGTCTTTCC |
| *Il-1β* | ATGGTGGATCCCAAGCAATAC | CTCCACTTTGCTCTTGACTTCT |
| *Il6* | TTGCCGAGTAGATCTCAAAGT | TTGCCGAGTAGATCTCAAAGTG |
| *Il10* | TTGAATTCCCTGGGTGAGAAG | TCCACTGCCTTGCTCTTATTT |
| *Il13* | GCCAAGATCTGTGTCTCT | GTCCACACTCCATACCAT |
| *Mtor* | CGGGACTACAGAGAGAAGAAGA | CATCAACGTCAGGTGGTCATAG |
| *NfkB* | GGATGACAGAGGCGTGTATTAG | CCTTCTCTCTGTCTGTGAGTTG |
| *Tnf-α* | TTGTCTACTCCCAGGTTCTCT | GAGGTTGACTTTCTCCTGGTATG |
| *Abcd1* | GTACAGTCTGGTGTCCATGTAG | GGGTGTGATGATAGGGATGTT |
| *Abcd2* | GACCATGCCTATGAGACCTATTT | GTAAGAGACTGGTCAGGGTTTG |
| *Abcd3* | CTTGCTTGTTTCTGGGCTATTC | CGTATCTGTATTCTCCTTCGTACTT |
| *Acaca* | AGCCAGAAGGGACAGTAGAA | CTCAGCCAAGCGGATGTAAA |
| *Acadvl* | CTTTGCAGGGACTCAAGGAA | CAAGCGAGCATACTGGGTATTA |
| *Acyl* | CGGGAGGAAGCTGATGAATATG | GTCAAGGTAGTGCCCAATGAA |
| *Acss1* | GAGCATGAGCAGTGAAGACA | CATGGCGGCATACAGTAGATAG |
| *Acss2* | CACCTTCTGGCAAACAGAAAC | CTACACCGAAGAATGGGAAAGA |
| *Apoa1* | CTCTGGGTTCAACCGTTAGTC | TCTCCTGTCTCACCCAATCT |
| *Cd36* | CTGGGACCATTGGTGATGAAA | CACCACTCCAATCCCAAGTAAG |
| *Cyp7a1* | CACCTTGAGGATGGTTCCTATAA | TCAAAGGGTCTGGGTAGATTTC |
| *Elovl4* | GACCTGGACCATTGCAGATAA | GCCACACGAACAGGAGATAG |
| *Elovl5* | GGTGTGTGGGAAGGCAAATAC | TGGAGAAGTAGTACCACCAGAG |
| *Elovl6* | CCGAACTAGGTGACACGATATT | TGTAGGAGTACCAGGAGTACAG |
| *Fads1* | TGGCTCACCCTTTGGATCTT | GTCATGCTGTAGCCAACCTG |
| *Fasn* | AGACCCGAACTCCAAGTTATTC | GCAGCTCCTTGTATACTTCTCC |
| *Lpl* | GCCCGAGGTTTCCACAAATA | GCTGAAGTAGGAGTCGCTTATC |
| *Nr1h2* | CCACGTCACCCACTATTAAGG | GCTCTAAGATGACCACGATGTAG |
| *Nr1h3* | GTGGAAGACAGAACCTCAAGAT | TGACTCCAACCCTATCCCTAA |
| *Prkaa1* | GATCCTTTCCGGTGTGGATTAT | GAAAGACCAAAGTCGGCTATCT |
| *Ptges* | GCAACGACATGGAGACAATCTA | TGTGAGGACAACGAGGAAATG |
| *Ptges2* | GCTCAATGACTCCTCTGTCATC | GCCTTCATGGGTGGGTAATAA |
| *Ptgis* | GATGGGAAACGGCTGAAGAA | GGTCGAAATGAGTCAGCAGTAG |
| *Scd1* | CAACTTCACCACGTTCTTCATC | CCCGTCTCCAGTTCTCTTAATC |
| *Sirt1* | GGAACCTTTGCCTCATCTACA | CACCTAGCCTATGACACAACTC |
| *Srebp1* | ACTTCCCTGGCCTATTTGACC | GGCATGGACGGGTACATCTT |
| *ITG1* | CCAGGAAAGAGGCATTCA | ACCTGTTTCAGGCGATAG |
| *ITG1* | GCTATCGTGCATGTTGTG | CAAGGCAAGGCCAATAAG |
| *ITG5* | CGCATCTCTCACCATCTT | TTGAGGCAGAAGCTAAGG |
| *ITG10* | TTTAGCTGCACCTTCCTC | GAGGTCTGAGCTGTGTTATC |
| *PPAR* | CGGTGTGTATGAAGCCATCT | TAAGGAACTCGCGTGTGATAAA |
| *PPAR* | CTGGCCTCCCTGATGAATAAAG | AGGCTCCATAAAGTCACCAAAG |
